# Supplementary material for: Ethylene polymerization catalyzed by dinickel complexes with a double-decker structure
Source: Royal Society of Chemistry journal article supplement (doi:10.1039/c7py00333a), 2017-01-01
Supplement: c7py00333a1.pdf [file c7py00333a1.pdf]

## Supplementary data

### Ethylene Polymerization Catalyzed by Dinickel Complex with a Double-Decker Structure

Daisuke Takeuchi, Yuriko Chiba, Shigenaga Takano,  
Hideo Kurihara, Minoru Kobayashi and Kohtaro Osakada

|                                                                               |                |
|-------------------------------------------------------------------------------|----------------|
| <b>ORTEP view of <math>[\text{Ni}_2\text{Me}_2(\text{PMe}_3)_2(2)]</math></b> | <b>S2</b>      |
| <b>NMR spectra of polymers</b>                                                | <b>S2-S4</b>   |
| <b>GPC charts of polymers</b>                                                 | <b>S5</b>      |
| <b>Crystallographic data details</b>                                          | <b>S6- S34</b> |

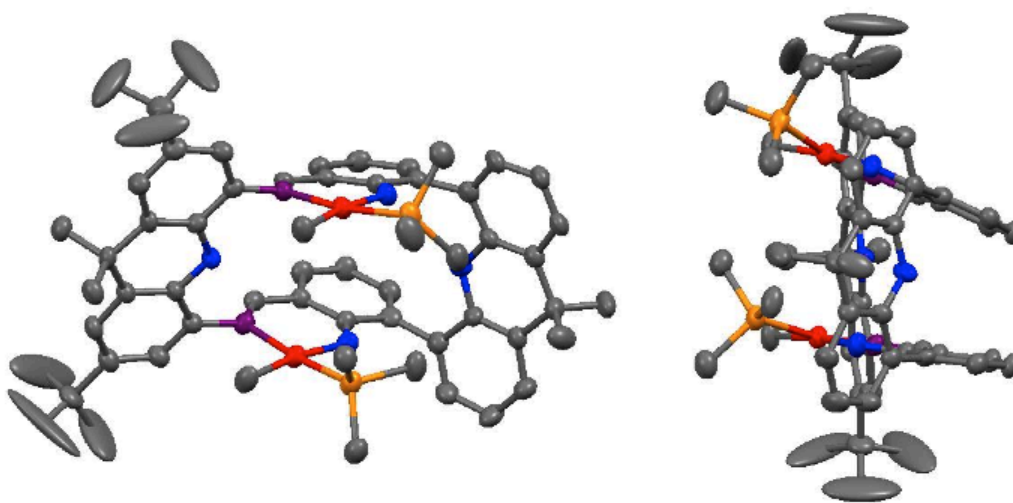

**Figure S-1.** Structure of  $[\text{Ni}_2\text{Me}_2(\text{PMe}_3)_2(\mathbf{2})]$  determined by X-ray crystallography. Hydrogen atoms are omitted for clarity.

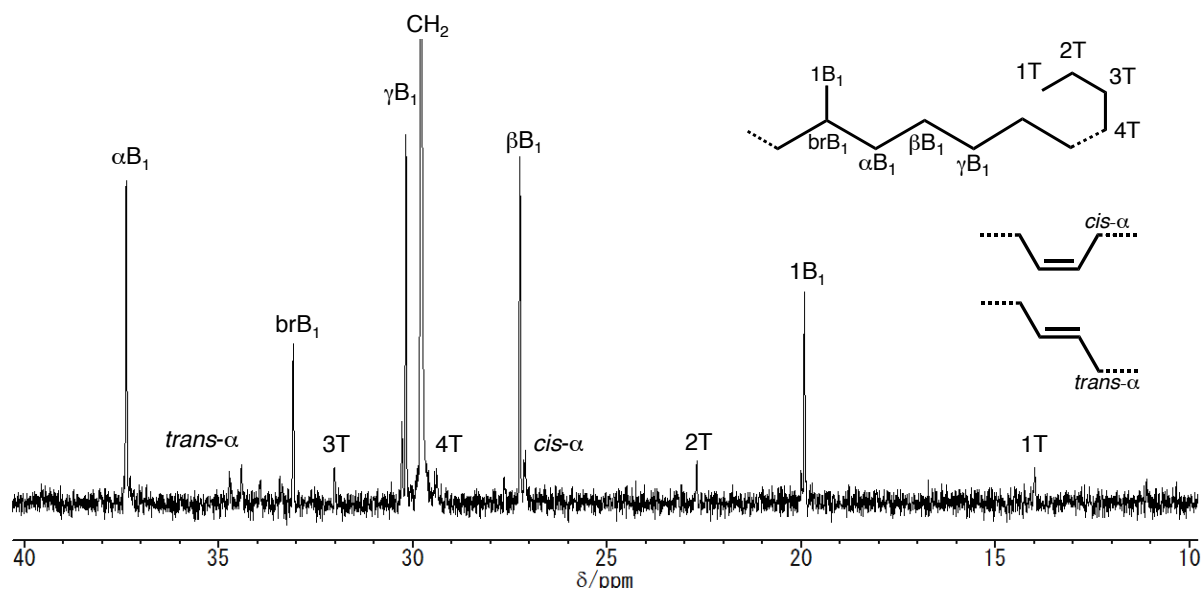

**Figure S-2.**  $^{13}\text{C}\{^1\text{H}\}$  NMR spectrum of polyethylene obtained by  $[\text{Ni}_2\text{Me}_2(\text{PMe}_3)_2(\mathbf{1})]/\text{Ni}(\text{cod})_2$ .

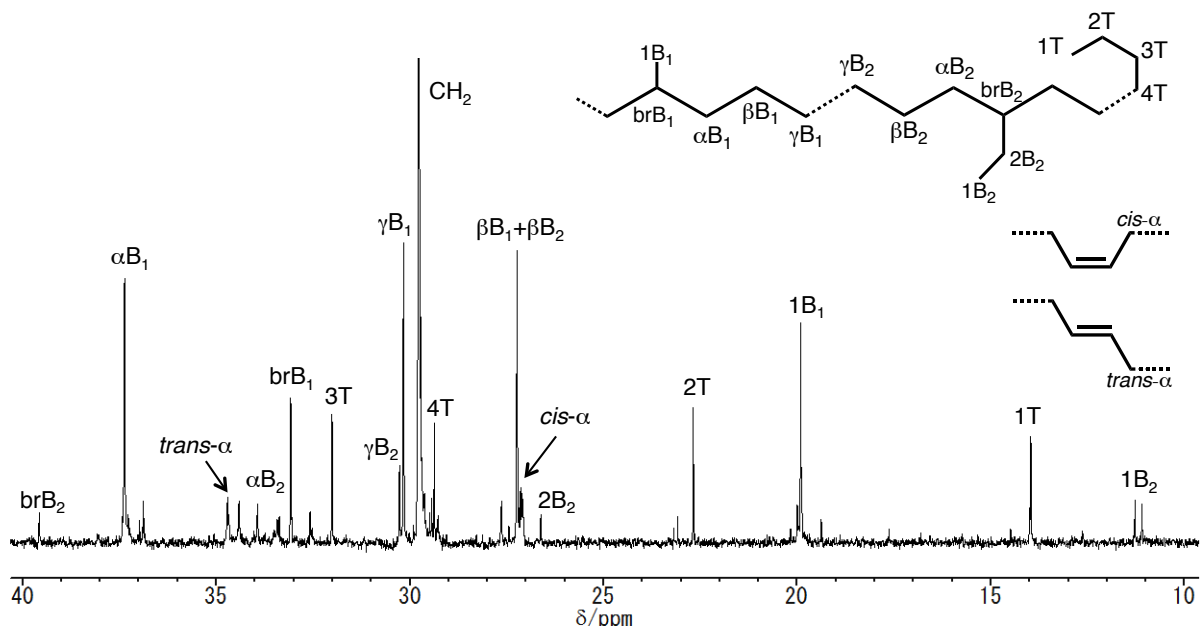

**Figure S-3.**  $^{13}\text{C}\{^1\text{H}\}$  NMR spectrum of polyethylene obtained by  $[\text{Ni}_2\text{Me}_2(\text{PMe}_3)_2(2)]/\text{Ni}(\text{cod})_2$ .

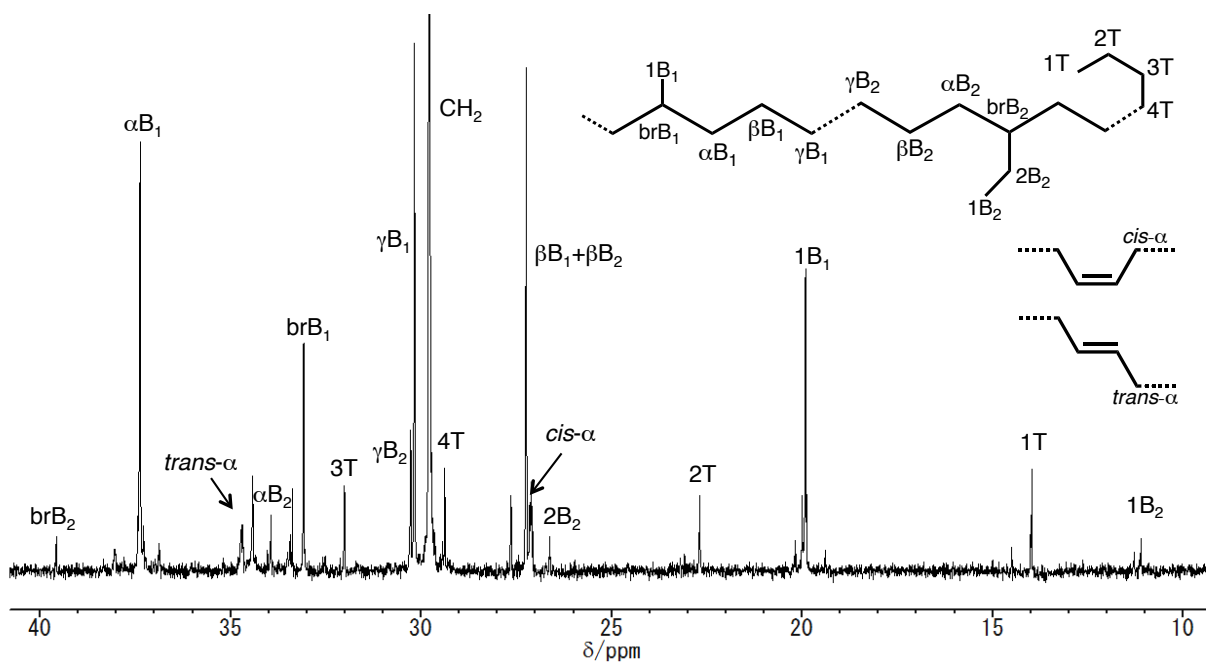

**Figure S-4.**  $^{13}\text{C}\{^1\text{H}\}$  NMR spectrum of polyethylene obtained by  $[\text{NiMe}(\text{PMe}_3)(1\text{-H})]/\text{Ni}(\text{cod})_2$ .

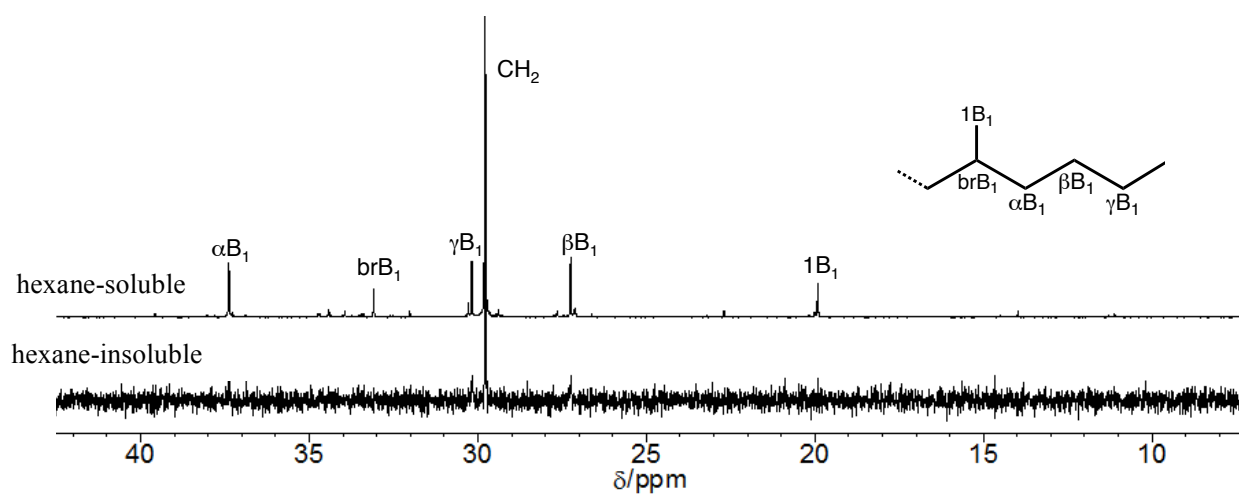

**Figure S-5.**  $^{13}\text{C}\{^1\text{H}\}$  NMR spectra of hexane-soluble and -insoluble fractions of polyethylene obtained by  $[\text{Ni}_2\text{Me}_2(\text{PMe}_3)_2(\mathbf{1})]/\text{Ni}(\text{cod})_2$ .

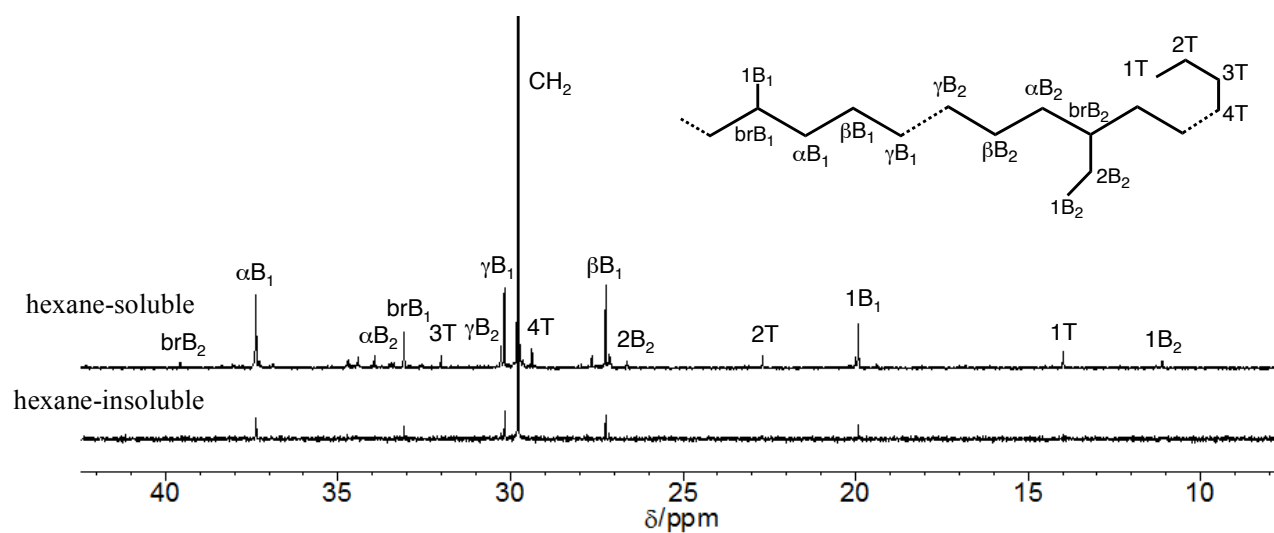

**Figure S-6.**  $^{13}\text{C}\{^1\text{H}\}$  NMR spectra of hexane-soluble and -insoluble fractions of polyethylene obtained by  $[\text{Ni}_2\text{Me}_2(\text{PMe}_3)_2(\mathbf{2})]/\text{Ni}(\text{cod})_2$ .

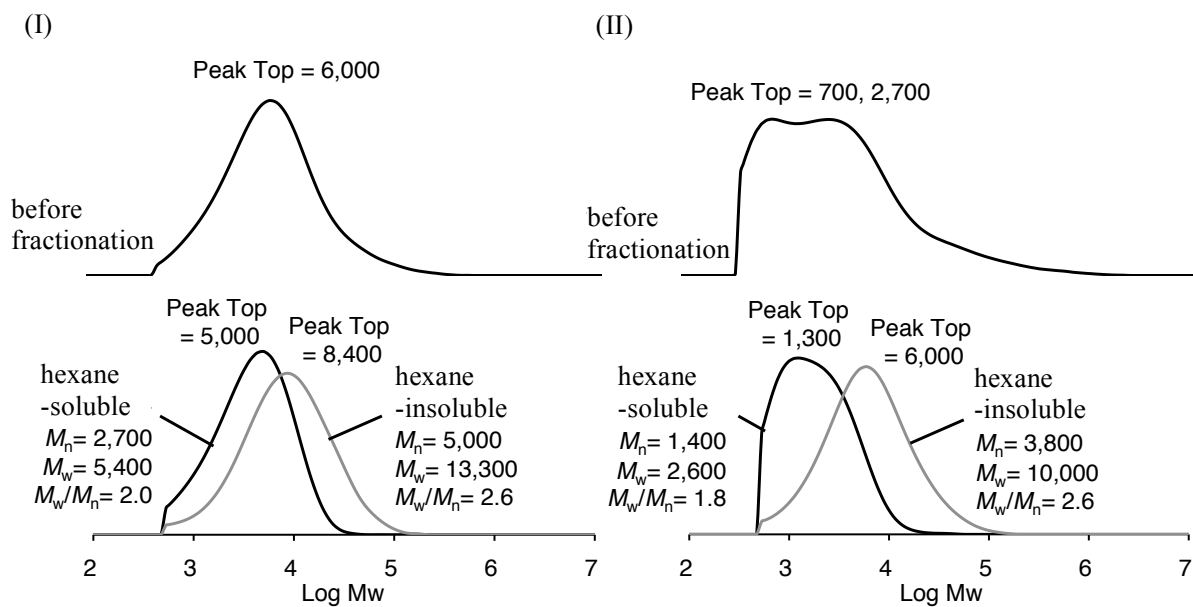

**Figure S-7.** GPC profiles of polyethylene obtained by (I)  $[\text{Ni}_2\text{Me}_2(\text{PMe}_3)_2(\mathbf{1})]/\text{Ni}(\text{cod})_2$  and by (I)  $[\text{Ni}_2\text{Me}_2(\text{PMe}_3)_2(\mathbf{2})]/\text{Ni}(\text{cod})_2$ .

**Table S-1.** Crystallographic data details of refinement of the ligand of [Ni<sub>2</sub>Me<sub>2</sub>(PMe<sub>3</sub>)<sub>2</sub>]**(2)**.

| [Ni <sub>2</sub> Me <sub>2</sub> (PMe <sub>3</sub> ) <sub>2</sub> ] <b>(2)</b> |                                                                                                                                 |
|--------------------------------------------------------------------------------|---------------------------------------------------------------------------------------------------------------------------------|
| formula                                                                        | C <sub>60</sub> H <sub>72</sub> N <sub>2</sub> Ni <sub>2</sub> O <sub>4</sub> P <sub>2</sub> ·(C <sub>6</sub> H <sub>14</sub> ) |
| formula wt                                                                     | 1150.76                                                                                                                         |
| cryst size/ mm                                                                 | 0.27×0.15×0.12                                                                                                                  |
| cryst syst                                                                     | monoclinic                                                                                                                      |
| cryst color                                                                    | red                                                                                                                             |
| space group                                                                    | <i>P</i> 2 <sub>1</sub> / <i>n</i> ( <i>No.</i> 14)                                                                             |
| <i>a</i> /Å                                                                    | 15.456(3)                                                                                                                       |
| <i>b</i> /Å                                                                    | 15.227(3)                                                                                                                       |
| <i>c</i> /Å                                                                    | 26.465(5)                                                                                                                       |
| <i>β</i> / deg                                                                 | 94.403(3)                                                                                                                       |
| <i>V</i> / Å <sup>3</sup>                                                      | 6210(2)                                                                                                                         |
| <i>Z</i>                                                                       | 4                                                                                                                               |
| <i>D</i> <sub>calcd</sub> / g cm <sup>-3</sup>                                 | 1.231                                                                                                                           |
| <i>F</i> (000)                                                                 | 2456                                                                                                                            |
| <i>μ</i> /mm <sup>-1</sup>                                                     | 7.049                                                                                                                           |
| no. of reflns measd                                                            | 50274                                                                                                                           |
| no. of unique reflns                                                           | 13968                                                                                                                           |
| <i>R</i> <sub>int</sub>                                                        | 0.0927                                                                                                                          |
| no. of obsd reflns                                                             | 13968                                                                                                                           |
| ( <i>I</i> > 2σ( <i>I</i> ))                                                   |                                                                                                                                 |
| no. of variables                                                               | 705                                                                                                                             |
| <i>R</i> ( <i>I</i> > 2σ( <i>I</i> ))                                          | 0.0859                                                                                                                          |
| <i>R</i> , <i>R</i> <sub>w</sub> (all data)                                    | 0.1346, 0.2636                                                                                                                  |
| GOF on <i>F</i> <sup>2</sup>                                                   | 1.034                                                                                                                           |

**Table S-2.** Atomic coordinates and B<sub>iso</sub>/B<sub>eq</sub>

| atom | x          | y          | z           | B <sub>eq</sub> |
|------|------------|------------|-------------|-----------------|
| Ni1  | 0.36700(4) | 0.89852(4) | 0.12058(2)  | 2.69(2)         |
| Ni2  | 0.67127(4) | 0.82904(4) | 0.10398(2)  | 2.65(2)         |
| P1   | 0.43044(9) | 1.02328(8) | 0.12209(5)  | 3.04(3)         |
| P2   | 0.76086(9) | 0.93542(9) | 0.12209(5)  | 3.37(3)         |
| O1   | 0.3845(3)  | 0.8955(2)  | 0.19207(11) | 2.90(6)         |
| O2   | 0.6768(2)  | 0.8128(2)  | 0.17533(11) | 2.69(6)         |
| O3   | 0.5575(2)  | 0.8916(2)  | 0.29451(13) | 3.21(7)         |
| O4   | 0.4380(2)  | 0.7193(2)  | 0.05085(11) | 2.56(6)         |
| N1   | 0.3247(3)  | 0.7785(3)  | 0.11616(13) | 2.59(7)         |
| N2   | 0.6048(3)  | 0.7228(3)  | 0.09107(13) | 2.50(7)         |
| C1   | 0.3432(4)  | 0.9196(4)  | 0.0484(2)   | 3.68(11)        |
| C2   | 0.6644(4)  | 0.8629(4)  | 0.0340(2)   | 3.61(10)        |
| C3   | 0.3213(3)  | 0.7268(3)  | 0.1553(2)   | 2.68(8)         |
| C4   | 0.3709(3)  | 0.8325(3)  | 0.2236(2)   | 2.44(8)         |
| C5   | 0.3413(3)  | 0.7480(3)  | 0.2071(2)   | 2.47(8)         |
| C6   | 0.3306(4)  | 0.6814(4)  | 0.2434(2)   | 3.04(9)         |
| C7   | 0.3472(4)  | 0.6959(4)  | 0.2943(2)   | 3.05(9)         |
| C8   | 0.3760(3)  | 0.7801(4)  | 0.3100(2)   | 2.97(9)         |
| C9   | 0.3871(3)  | 0.8474(3)  | 0.2768(2)   | 2.62(8)         |
| C10  | 0.5737(3)  | 0.6747(3)  | 0.1260(2)   | 2.45(8)         |
| C11  | 0.6378(3)  | 0.7548(3)  | 0.2016(2)   | 2.52(8)         |
| C12  | 0.5854(3)  | 0.6863(3)  | 0.1793(2)   | 2.36(8)         |
| C13  | 0.5448(3)  | 0.6264(3)  | 0.2108(2)   | 2.73(8)         |
| C14  | 0.5553(4)  | 0.6312(4)  | 0.2626(2)   | 3.06(9)         |
| C15  | 0.6066(3)  | 0.6999(3)  | 0.2850(2)   | 2.89(9)         |
| C16  | 0.6472(3)  | 0.7605(3)  | 0.2558(2)   | 2.50(8)         |
| C17  | 0.2938(3)  | 0.7405(3)  | 0.0685(2)   | 2.60(8)         |
| C18  | 0.2055(3)  | 0.7342(4)  | 0.0555(2)   | 3.04(9)         |
| C19  | 0.1728(4)  | 0.7052(4)  | 0.0078(2)   | 3.18(9)         |
| C20  | 0.2324(3)  | 0.6793(4)  | -0.0252(2)  | 2.95(9)         |

|     |           |            |            |          |
|-----|-----------|------------|------------|----------|
| C21 | 0.3223(3) | 0.6820(3)  | -0.0139(2) | 2.64(8)  |
| C22 | 0.3509(3) | 0.7130(3)  | 0.0337(2)  | 2.65(8)  |
| C23 | 0.5850(3) | 0.6896(3)  | 0.0406(2)  | 2.46(8)  |
| C24 | 0.6500(4) | 0.6596(4)  | 0.0119(2)  | 3.05(9)  |
| C25 | 0.6319(4) | 0.6278(4)  | -0.0366(2) | 3.28(9)  |
| C26 | 0.5468(4) | 0.6282(4)  | -0.0567(2) | 3.00(9)  |
| C27 | 0.4779(3) | 0.6575(3)  | -0.0289(2) | 2.57(8)  |
| C28 | 0.4987(3) | 0.6888(3)  | 0.0197(2)  | 2.57(8)  |
| C29 | 0.3855(3) | 0.6532(3)  | -0.0520(2) | 2.75(9)  |
| C30 | 0.3640(4) | 0.5596(4)  | -0.0693(2) | 3.49(10) |
| C31 | 0.3743(4) | 0.7169(4)  | -0.0982(2) | 3.48(10) |
| C32 | 0.0754(4) | 0.6993(4)  | -0.0072(3) | 4.07(12) |
| C33 | 0.0461(6) | 0.6109(8)  | 0.0012(9)  | 21.4(10) |
| C34 | 0.0537(5) | 0.734(2)   | -0.0548(5) | 22.2(10) |
| C35 | 0.0228(6) | 0.7461(13) | 0.0301(5)  | 16.9(7)  |
| C36 | 0.7041(4) | 0.5935(4)  | -0.0692(2) | 3.78(11) |
| C37 | 0.7132(8) | 0.6500(7)  | -0.1106(5) | 14.2(6)  |
| C38 | 0.6778(7) | 0.5051(7)  | -0.0921(5) | 11.2(4)  |
| C39 | 0.7821(6) | 0.5720(13) | -0.0385(4) | 18.6(8)  |
| C40 | 0.4144(3) | 0.9375(4)  | 0.2949(2)  | 2.74(8)  |
| C41 | 0.3540(4) | 1.0021(4)  | 0.3027(2)  | 3.55(10) |
| C42 | 0.3810(4) | 1.0847(4)  | 0.3202(3)  | 4.16(12) |
| C43 | 0.4675(4) | 1.1033(4)  | 0.3286(2)  | 3.34(10) |
| C44 | 0.5311(3) | 1.0406(4)  | 0.3203(2)  | 2.87(9)  |
| C45 | 0.5020(3) | 0.9586(3)  | 0.3043(2)  | 2.60(8)  |
| C46 | 0.6453(3) | 0.9074(4)  | 0.2958(2)  | 2.66(8)  |
| C47 | 0.6931(3) | 0.8384(3)  | 0.2784(2)  | 2.73(8)  |
| C48 | 0.7823(3) | 0.8500(4)  | 0.2783(2)  | 3.01(9)  |
| C49 | 0.8217(4) | 0.9282(4)  | 0.2938(2)  | 3.18(9)  |
| C50 | 0.7717(4) | 0.9956(4)  | 0.3102(2)  | 3.19(9)  |
| C51 | 0.6815(4) | 0.9876(4)  | 0.3120(2)  | 2.90(9)  |
| C52 | 0.6277(4) | 1.0636(4)  | 0.3281(2)  | 3.30(10) |
| C53 | 0.6454(4) | 1.1450(4)  | 0.2946(3)  | 4.72(13) |



|     |            |            |           |          |
|-----|------------|------------|-----------|----------|
| C54 | 0.6522(4)  | 1.0853(5)  | 0.3842(3) | 5.0(2)   |
| C55 | 0.3643(4)  | 1.1213(4)  | 0.1108(2) | 3.96(11) |
| C56 | 0.5116(4)  | 1.0345(4)  | 0.0769(2) | 3.82(11) |
| C57 | 0.4906(4)  | 1.0496(4)  | 0.1823(2) | 4.10(12) |
| C58 | 0.7989(5)  | 1.0080(5)  | 0.0746(3) | 5.4(2)   |
| C59 | 0.8611(4)  | 0.8898(4)  | 0.1508(2) | 4.09(11) |
| C60 | 0.7276(4)  | 1.0113(4)  | 0.1698(2) | 4.10(11) |
| C61 | 0.1071(9)  | 1.0358(8)  | 0.0769(6) | 12.1(4)  |
| C62 | 0.1042(11) | 0.9626(11) | 0.1108(6) | 14.5(6)  |
| C63 | 0.1322(9)  | 0.9493(6)  | 0.1685(7) | 13.6(5)  |
| C64 | 0.1092(6)  | 0.8591(7)  | 0.1909(4) | 9.5(4)   |
| C65 | 0.103(2)   | 0.8771(12) | 0.2440(6) | 24.0(13) |
| C66 | 0.0804(12) | 0.7933(12) | 0.2616(6) | 17.5(8)  |

$$B_{eq} = 8/3 p^2 (U_{11}(aa^*)^2 + U_{22}(bb^*)^2 + U_{33}(cc^*)^2 + 2U_{12}(aa^*bb^*)\cos g + 2U_{13}(aa^*cc^*)\cos b + 2U_{23}(bb^*cc^*)\cos a)$$

**Table S-3.** Atomic coordinates and B<sub>iso</sub> involving hydrogen atoms

| atom | x       | y      | z       | B <sub>iso</sub> |
|------|---------|--------|---------|------------------|
| H1   | 0.3487  | 0.9825 | 0.0415  | 4.42             |
| H2   | 0.2841  | 0.9002 | 0.0378  | 4.42             |
| H3   | 0.3848  | 0.8868 | 0.0296  | 4.42             |
| H4   | 0.6081  | 0.8450 | 0.0176  | 4.33             |
| H5   | 0.7110  | 0.8341 | 0.0170  | 4.33             |
| H6   | 0.6705  | 0.9267 | 0.0314  | 4.33             |
| H7   | 0.3034  | 0.6682 | 0.1482  | 3.22             |
| H8   | 0.3114  | 0.6249 | 0.2321  | 3.65             |
| H9   | 0.3394  | 0.6507 | 0.3182  | 3.66             |
| H10  | 0.3883  | 0.7906 | 0.3452  | 3.56             |
| H11  | 0.5391  | 0.6261 | 0.1145  | 2.94             |
| H12  | 0.5091  | 0.5814 | 0.1956  | 3.27             |
| H13  | 0.5288  | 0.5892 | 0.2831  | 3.68             |
| H14  | 0.6132  | 0.7046 | 0.3209  | 3.47             |
| H15  | 0.1661  | 0.7500 | 0.0798  | 3.65             |
| H16  | 0.2113  | 0.6583 | -0.0577 | 3.54             |
| H17  | 0.7085  | 0.6609 | 0.0259  | 3.66             |
| H18  | 0.5341  | 0.6079 | -0.0904 | 3.60             |
| H19  | 0.3718  | 0.5197 | -0.0402 | 4.19             |
| H20  | 0.4027  | 0.5420 | -0.0951 | 4.19             |
| H21  | 0.3037  | 0.5569 | -0.0836 | 4.19             |
| H22  | 0.3158  | 0.7106 | -0.1148 | 4.17             |
| H23  | 0.4173  | 0.7027 | -0.1223 | 4.17             |
| H24  | 0.3830  | 0.7775 | -0.0864 | 4.17             |
| H25  | 0.0342  | 0.5813 | -0.0315 | 25.62            |
| H26  | -0.0070 | 0.6127 | 0.0192  | 25.62            |
| H27  | 0.0912  | 0.5787 | 0.0216  | 25.62            |
| H28  | -0.0074 | 0.7518 | -0.0574 | 26.68            |
| H29  | 0.0628  | 0.6893 | -0.0806 | 26.68            |
| H30  | 0.0904  | 0.7850 | -0.0603 | 26.68            |

|     |         |        |         |       |
|-----|---------|--------|---------|-------|
| H31 | -0.0389 | 0.7428 | 0.0186  | 20.31 |
| H32 | 0.0408  | 0.8078 | 0.0326  | 20.31 |
| H33 | 0.0323  | 0.7182 | 0.0634  | 20.31 |
| H34 | 0.7272  | 0.6154 | -0.1401 | 17.01 |
| H35 | 0.7599  | 0.6921 | -0.1020 | 17.01 |
| H36 | 0.6587  | 0.6817 | -0.1186 | 17.01 |
| H37 | 0.7278  | 0.4783 | -0.1068 | 13.49 |
| H38 | 0.6307  | 0.5134 | -0.1186 | 13.49 |
| H39 | 0.6581  | 0.4666 | -0.0656 | 13.49 |
| H40 | 0.8112  | 0.6262 | -0.0266 | 22.28 |
| H41 | 0.8210  | 0.5382 | -0.0587 | 22.28 |
| H42 | 0.7674  | 0.5370 | -0.0093 | 22.28 |
| H43 | 0.2939  | 0.9901 | 0.2961  | 4.26  |
| H44 | 0.3391  | 1.1283 | 0.3263  | 4.99  |
| H45 | 0.4848  | 1.1601 | 0.3403  | 4.01  |
| H46 | 0.8169  | 0.8033 | 0.2672  | 3.61  |
| H47 | 0.8827  | 0.9351 | 0.2932  | 3.81  |
| H48 | 0.7990  | 1.0492 | 0.3206  | 3.83  |
| H49 | 0.6055  | 1.1925 | 0.3020  | 5.67  |
| H50 | 0.6364  | 1.1288 | 0.2587  | 5.67  |
| H51 | 0.7054  | 1.1647 | 0.3021  | 5.67  |
| H52 | 0.7139  | 1.1007 | 0.3887  | 6.04  |
| H53 | 0.6411  | 1.0340 | 0.4051  | 6.04  |
| H54 | 0.6172  | 1.1350 | 0.3945  | 6.04  |
| H55 | 0.3311  | 1.1165 | 0.0779  | 4.75  |
| H56 | 0.4020  | 1.1731 | 0.1109  | 4.75  |
| H57 | 0.3243  | 1.1271 | 0.1376  | 4.75  |
| H58 | 0.5388  | 1.0925 | 0.0806  | 4.58  |
| H59 | 0.4841  | 1.0281 | 0.0425  | 4.58  |
| H60 | 0.5558  | 0.9888 | 0.0832  | 4.58  |
| H61 | 0.5234  | 1.1041 | 0.1787  | 4.92  |
| H62 | 0.5309  | 1.0016 | 0.1919  | 4.92  |
| H63 | 0.4499  | 1.0572 | 0.2086  | 4.92  |

|     |        |        |        |       |
|-----|--------|--------|--------|-------|
| H64 | 0.8425 | 1.0482 | 0.0905 | 6.53  |
| H65 | 0.7500 | 1.0420 | 0.0591 | 6.53  |
| H66 | 0.8249 | 0.9733 | 0.0485 | 6.53  |
| H67 | 0.8997 | 0.9376 | 0.1630 | 4.91  |
| H68 | 0.8894 | 0.8552 | 0.1255 | 4.91  |
| H69 | 0.8485 | 0.8520 | 0.1793 | 4.91  |
| H70 | 0.6830 | 1.0509 | 0.1546 | 4.92  |
| H71 | 0.7779 | 1.0456 | 0.1833 | 4.92  |
| H72 | 0.7040 | 0.9782 | 0.1974 | 4.92  |
| H73 | 0.1668 | 1.0578 | 0.0773 | 14.49 |
| H74 | 0.0690 | 1.0826 | 0.0877 | 14.49 |
| H75 | 0.0876 | 1.0171 | 0.0424 | 14.49 |
| H76 | 0.1355 | 0.9156 | 0.0939 | 17.38 |
| H77 | 0.0424 | 0.9447 | 0.1077 | 17.38 |
| H78 | 0.1958 | 0.9576 | 0.1737 | 16.30 |
| H79 | 0.1047 | 0.9958 | 0.1879 | 16.30 |
| H80 | 0.0533 | 0.8370 | 0.1750 | 11.44 |
| H81 | 0.1552 | 0.8153 | 0.1859 | 11.44 |
| H82 | 0.1595 | 0.8973 | 0.2605 | 28.75 |
| H83 | 0.0579 | 0.9213 | 0.2494 | 28.75 |
| H84 | 0.1303 | 0.7536 | 0.2608 | 21.04 |
| H85 | 0.0318 | 0.7699 | 0.2397 | 21.04 |
| H86 | 0.0634 | 0.7981 | 0.2964 | 21.04 |

**Table S-4.** Anisotropic displacement parameters

| atom | U <sub>11</sub>         | U <sub>22</sub> | U <sub>33</sub> | U <sub>12</sub> | U <sub>13</sub> |
|------|-------------------------|-----------------|-----------------|-----------------|-----------------|
|      | U <sub>23</sub>         |                 |                 |                 |                 |
| Ni1  | 0.0432(4)<br>0.0018(3)  | 0.0300(4)       | 0.0295(4)       | -0.0017(3)      | 0.0058(3)       |
| Ni2  | 0.0362(4)<br>0.0036(3)  | 0.0337(4)       | 0.0303(4)       | -0.0036(3)      | -0.0007(3)      |
| P1   | 0.0503(8)<br>0.0022(5)  | 0.0317(7)       | 0.0341(7)       | -0.0044(6)      | 0.0054(6)       |
| P2   | 0.0460(8)<br>0.0071(6)  | 0.0418(8)       | 0.0395(7)       | -0.0127(6)      | -0.0007(6)      |
| O1   | 0.050(2)<br>0.0035(13)  | 0.034(2)        | 0.028(2)        | -0.001(2)       | 0.007(2)        |
| O2   | 0.036(2)<br>0.005(2)    | 0.036(2)        | 0.030(2)        | -0.006(2)       | -0.001(2)       |
| O3   | 0.029(2)<br>-0.004(2)   | 0.033(2)        | 0.059(3)        | 0.002(2)        | -0.002(2)       |
| O4   | 0.030(2)<br>-0.0055(13) | 0.040(2)        | 0.027(2)        | -0.001(2)       | 0.0018(13)      |
| N1   | 0.039(3)<br>-0.001(2)   | 0.031(2)        | 0.030(2)        | -0.003(2)       | 0.008(2)        |
| N2   | 0.033(2)<br>-0.001(2)   | 0.033(2)        | 0.029(2)        | 0.001(2)        | -0.000(2)       |
| C1   | 0.074(4)<br>0.005(2)    | 0.037(3)        | 0.030(3)        | -0.002(3)       | 0.006(3)        |
| C2   | 0.057(4)<br>0.008(3)    | 0.043(3)        | 0.036(3)        | -0.006(3)       | -0.002(3)       |
| C3   | 0.028(3)<br>-0.000(2)   | 0.031(3)        | 0.042(3)        | -0.003(2)       | 0.004(2)        |
| C4   | 0.031(3)<br>0.001(2)    | 0.029(3)        | 0.033(3)        | -0.004(2)       | 0.006(2)        |

|     |                       |          |          |           |           |
|-----|-----------------------|----------|----------|-----------|-----------|
| C5  | 0.029(3)<br>0.004(2)  | 0.033(3) | 0.032(3) | -0.003(2) | 0.002(2)  |
| C6  | 0.042(3)<br>0.005(2)  | 0.034(3) | 0.040(3) | -0.009(2) | 0.006(3)  |
| C7  | 0.044(3)<br>0.007(2)  | 0.037(3) | 0.035(3) | -0.010(3) | 0.007(3)  |
| C8  | 0.036(3)<br>0.002(2)  | 0.044(3) | 0.034(3) | -0.002(3) | 0.004(2)  |
| C9  | 0.027(3)<br>0.000(2)  | 0.042(3) | 0.033(3) | 0.002(2)  | 0.012(2)  |
| C10 | 0.032(3)<br>0.003(2)  | 0.029(3) | 0.032(3) | 0.004(2)  | -0.002(2) |
| C11 | 0.034(3)<br>0.000(2)  | 0.032(3) | 0.029(3) | 0.003(2)  | 0.001(2)  |
| C12 | 0.024(2)<br>0.003(2)  | 0.030(3) | 0.035(3) | 0.001(2)  | 0.000(2)  |
| C13 | 0.037(3)<br>0.001(2)  | 0.029(3) | 0.038(3) | 0.002(2)  | 0.004(2)  |
| C14 | 0.046(3)<br>0.009(2)  | 0.034(3) | 0.037(3) | 0.001(3)  | 0.010(3)  |
| C15 | 0.040(3)<br>0.002(2)  | 0.037(3) | 0.033(3) | 0.007(2)  | 0.006(2)  |
| C16 | 0.028(3)<br>-0.001(2) | 0.038(3) | 0.029(3) | 0.005(2)  | -0.000(2) |
| C17 | 0.030(3)<br>0.001(2)  | 0.035(3) | 0.035(3) | -0.001(2) | 0.003(2)  |
| C18 | 0.033(3)<br>0.002(3)  | 0.045(3) | 0.037(3) | 0.001(3)  | 0.001(2)  |
| C19 | 0.035(3)<br>0.003(3)  | 0.046(3) | 0.039(3) | -0.005(3) | -0.001(2) |
| C20 | 0.035(3)<br>-0.001(2) | 0.043(3) | 0.033(3) | -0.007(2) | -0.005(2) |

|     |                       |          |           |           |            |
|-----|-----------------------|----------|-----------|-----------|------------|
| C21 | 0.031(3)<br>-0.001(2) | 0.037(3) | 0.032(3)  | -0.002(2) | -0.002(2)  |
| C22 | 0.032(3)<br>-0.000(2) | 0.034(3) | 0.033(3)  | -0.001(2) | -0.005(2)  |
| C23 | 0.035(3)<br>0.002(2)  | 0.028(3) | 0.031(3)  | 0.002(2)  | 0.006(2)   |
| C24 | 0.037(3)<br>0.005(2)  | 0.044(3) | 0.035(3)  | 0.004(3)  | 0.003(2)   |
| C25 | 0.043(3)<br>0.004(3)  | 0.046(3) | 0.037(3)  | 0.003(3)  | 0.013(3)   |
| C26 | 0.040(3)<br>-0.001(2) | 0.043(3) | 0.032(3)  | 0.004(3)  | 0.005(2)   |
| C27 | 0.039(3)<br>0.000(2)  | 0.035(3) | 0.022(3)  | -0.002(2) | -0.002(2)  |
| C28 | 0.036(3)<br>0.000(2)  | 0.032(3) | 0.030(3)  | 0.003(2)  | 0.005(2)   |
| C29 | 0.043(3)<br>-0.004(2) | 0.033(3) | 0.029(3)  | -0.005(2) | -0.002(2)  |
| C30 | 0.050(4)<br>-0.009(3) | 0.042(3) | 0.041(3)  | -0.005(3) | 0.003(3)   |
| C31 | 0.045(3)<br>0.005(3)  | 0.052(4) | 0.034(3)  | -0.006(3) | -0.004(3)  |
| C32 | 0.027(3)<br>-0.003(3) | 0.063(4) | 0.062(4)  | 0.001(3)  | -0.007(3)  |
| C33 | 0.039(5)<br>0.05(2)   | 0.099(9) | 0.66(4)   | -0.030(6) | -0.076(12) |
| C34 | 0.023(4)<br>0.20(2)   | 0.68(4)  | 0.135(10) | 0.002(10) | -0.015(5)  |
| C35 | 0.034(5)<br>-0.14(2)  | 0.41(3)  | 0.191(13) | 0.027(9)  | -0.029(6)  |
| C36 | 0.050(4)<br>0.001(3)  | 0.058(4) | 0.038(3)  | 0.013(3)  | 0.014(3)   |

|     |                        |          |           |           |           |
|-----|------------------------|----------|-----------|-----------|-----------|
| C37 | 0.215(13)<br>0.097(9)  | 0.115(9) | 0.236(13) | 0.083(9)  | 0.199(12) |
| C38 | 0.123(8)<br>-0.106(8)  | 0.110(8) | 0.209(11) | -0.045(6) | 0.108(8)  |
| C39 | 0.065(6)<br>-0.116(12) | 0.54(3)  | 0.096(8)  | 0.119(12) | -0.019(6) |
| C40 | 0.037(3)<br>0.000(2)   | 0.039(3) | 0.029(3)  | 0.000(2)  | 0.006(2)  |
| C41 | 0.032(3)<br>-0.008(3)  | 0.053(4) | 0.050(3)  | 0.004(3)  | 0.004(3)  |
| C42 | 0.043(3)<br>-0.019(3)  | 0.043(3) | 0.074(4)  | 0.003(3)  | 0.013(3)  |
| C43 | 0.042(3)<br>-0.008(3)  | 0.036(3) | 0.049(3)  | 0.003(3)  | 0.007(3)  |
| C44 | 0.036(3)<br>-0.002(2)  | 0.040(3) | 0.032(3)  | -0.002(2) | -0.002(2) |
| C45 | 0.033(3)<br>-0.005(2)  | 0.036(3) | 0.030(3)  | 0.004(2)  | 0.003(2)  |
| C46 | 0.028(3)<br>0.002(2)   | 0.043(3) | 0.029(3)  | 0.000(2)  | -0.002(2) |
| C47 | 0.040(3)<br>0.006(2)   | 0.038(3) | 0.025(3)  | 0.002(2)  | 0.001(2)  |
| C48 | 0.033(3)<br>-0.000(2)  | 0.053(3) | 0.027(3)  | 0.001(3)  | -0.004(2) |
| C49 | 0.036(3)<br>-0.005(3)  | 0.051(3) | 0.033(3)  | -0.000(3) | -0.004(2) |
| C50 | 0.036(3)<br>-0.000(3)  | 0.046(3) | 0.038(3)  | -0.004(3) | -0.009(3) |
| C51 | 0.036(3)<br>0.002(2)   | 0.041(3) | 0.032(3)  | -0.001(2) | -0.001(2) |
| C52 | 0.038(3)<br>-0.009(3)  | 0.039(3) | 0.048(3)  | -0.001(3) | -0.003(3) |



|     |                         |           |           |           |           |
|-----|-------------------------|-----------|-----------|-----------|-----------|
| C53 | 0.041(3)<br>0.007(3)    | 0.044(4)  | 0.093(5)  | -0.004(3) | -0.003(3) |
| C54 | 0.053(4)<br>-0.033(4)   | 0.080(5)  | 0.056(4)  | 0.012(4)  | -0.017(3) |
| C55 | 0.065(4)<br>-0.000(3)   | 0.038(3)  | 0.047(3)  | -0.001(3) | 0.002(3)  |
| C56 | 0.052(4)<br>0.004(3)    | 0.048(4)  | 0.044(3)  | -0.008(3) | 0.003(3)  |
| C57 | 0.072(4)<br>0.002(3)    | 0.045(3)  | 0.038(3)  | -0.018(3) | -0.002(3) |
| C58 | 0.069(5)<br>0.024(4)    | 0.072(5)  | 0.064(4)  | -0.029(4) | -0.006(4) |
| C59 | 0.045(4)<br>0.006(3)    | 0.054(4)  | 0.056(4)  | -0.009(3) | 0.001(3)  |
| C60 | 0.059(4)<br>0.000(3)    | 0.046(4)  | 0.049(4)  | -0.009(3) | -0.007(3) |
| C61 | 0.128(10)<br>-0.040(10) | 0.104(9)  | 0.23(2)   | -0.004(8) | 0.030(10) |
| C62 | 0.21(2)<br>0.004(11)    | 0.21(2)   | 0.135(11) | -0.11(2)  | 0.066(11) |
| C63 | 0.168(12)<br>-0.066(9)  | 0.046(6)  | 0.30(2)   | 0.006(7)  | 0.031(12) |
| C64 | 0.080(6)<br>-0.060(8)   | 0.147(10) | 0.130(9)  | 0.038(7)  | -0.030(6) |
| C65 | 0.45(4)<br>-0.10(2)     | 0.15(2)   | 0.28(3)   | 0.03(2)   | -0.20(3)  |
| C66 | 0.26(2)<br>-0.12(2)     | 0.20(2)   | 0.20(2)   | 0.06(2)   | -0.05(2)  |

The general temperature factor expression:  $\exp(-2p^2(a^2U_{11}h^2 + b^2U_{22}k^2 + c^2U_{33}l^2 + 2a*b*U_{12}hk + 2a*c*U_{13}hl + 2b*c*U_{23}kl))$

**Table S-5.** Bond lengths (Å)

| atom | atom | distance   | atom | atom |
|------|------|------------|------|------|
| Ni1  | P1   | 2.1368(15) | Ni1  | O1   |
|      |      | 1.891(3)   |      |      |
| Ni1  | N1   | 1.942(4)   | Ni1  | C1   |
|      |      | 1.944(5)   |      |      |
| Ni2  | P2   | 2.1608(16) | Ni2  | O2   |
|      |      | 1.900(3)   |      |      |
| Ni2  | N2   | 1.933(4)   | Ni2  | C2   |
|      |      | 1.918(5)   |      |      |
| P1   | C55  | 1.821(6)   | P1   | C56  |
|      |      | 1.805(6)   |      |      |
| P1   | C57  | 1.826(6)   | P2   | C58  |
|      |      | 1.805(7)   |      |      |
| P2   | C59  | 1.811(6)   | P2   | C60  |
|      |      | 1.815(6)   |      |      |
| O1   | C4   | 1.300(6)   | O2   | C11  |
|      |      | 1.302(6)   |      |      |
| O3   | C45  | 1.371(6)   | O3   | C46  |
|      |      | 1.377(6)   |      |      |
| O4   | C22  | 1.389(6)   | O4   | C28  |
|      |      | 1.377(6)   |      |      |
| N1   | C3   | 1.304(6)   | N1   | C17  |
|      |      | 1.435(6)   |      |      |
| N2   | C10  | 1.300(6)   | N2   | C23  |
|      |      | 1.440(6)   |      |      |
| C3   | C5   | 1.420(6)   | C4   | C5   |
|      |      | 1.424(7)   |      |      |
| C4   | C9   | 1.429(7)   | C5   | C6   |
|      |      | 1.415(7)   |      |      |

|     |                  |           |     |     |
|-----|------------------|-----------|-----|-----|
| C6  | C7<br>1.409(7)   | 1.369(7)  | C7  | C8  |
| C8  | C9<br>1.502(7)   | 1.369(7)  | C9  | C40 |
| C10 | C12<br>1.421(6)  | 1.419(6)  | C11 | C12 |
| C11 | C16<br>1.415(7)  | 1.433(6)  | C12 | C13 |
| C13 | C14<br>1.415(7)  | 1.371(7)  | C14 | C15 |
| C15 | C16<br>1.485(7)  | 1.385(7)  | C16 | C47 |
| C17 | C18<br>1.389(7)  | 1.385(7)  | C17 | C22 |
| C18 | C19<br>1.376(7)  | 1.395(7)  | C19 | C20 |
| C19 | C32<br>1.399(7)  | 1.529(7)  | C20 | C21 |
| C21 | C22<br>1.522(7)  | 1.385(7)  | C21 | C29 |
| C23 | C24<br>1.404(7)  | 1.383(7)  | C23 | C28 |
| C24 | C25<br>1.380(7)  | 1.380(7)  | C25 | C26 |
| C25 | C36<br>1.413(7)  | 1.552(8)  | C26 | C27 |
| C27 | C28<br>1.512(7)  | 1.385(6)  | C27 | C29 |
| C29 | C30<br>1.559(7)  | 1.527(7)  | C29 | C31 |
| C32 | C33<br>1.384(15) | 1.443(14) | C32 | C34 |

|     |           |           |     |     |
|-----|-----------|-----------|-----|-----|
| C32 | C35       | 1.505(15) | C36 | C37 |
|     | 1.410(13) |           |     |     |
| C36 | C38       | 1.518(12) | C36 | C39 |
|     | 1.438(12) |           |     |     |
| C40 | C41       | 1.382(8)  | C40 | C45 |
|     | 1.394(7)  |           |     |     |
| C41 | C42       | 1.393(8)  | C42 | C43 |
|     | 1.368(8)  |           |     |     |
| C43 | C44       | 1.400(7)  | C44 | C45 |
|     | 1.383(7)  |           |     |     |
| C44 | C52       | 1.531(7)  | C46 | C47 |
|     | 1.383(7)  |           |     |     |
| C46 | C51       | 1.397(7)  | C47 | C48 |
|     | 1.389(7)  |           |     |     |
| C48 | C49       | 1.385(8)  | C49 | C50 |
|     | 1.376(8)  |           |     |     |
| C50 | C51       | 1.403(7)  | C51 | C52 |
|     | 1.505(8)  |           |     |     |
| C52 | C53       | 1.560(8)  | C52 | C54 |
|     | 1.540(8)  |           |     |     |
| C61 | C62       | 1.43(2)   | C62 | C63 |
|     | 1.57(3)   |           |     |     |
| C63 | C64       | 1.548(16) | C64 | C65 |
|     | 1.443(18) |           |     |     |
| C65 | C66       | 1.41(3)   |     |     |

**Table S-6.** Bond lengths involving hydrogens (Å)

| atom | atom  | distance | atom | atom |
|------|-------|----------|------|------|
| C1   | H1    | 0.980    | C1   | H2   |
|      | 0.980 |          |      |      |
| C1   | H3    | 0.980    | C2   | H4   |
|      | 0.980 |          |      |      |
| C2   | H5    | 0.980    | C2   | H6   |
|      | 0.980 |          |      |      |
| C3   | H7    | 0.950    | C6   | H8   |
|      | 0.950 |          |      |      |
| C7   | H9    | 0.950    | C8   | H10  |
|      | 0.950 |          |      |      |
| C10  | H11   | 0.950    | C13  | H12  |
|      | 0.950 |          |      |      |
| C14  | H13   | 0.950    | C15  | H14  |
|      | 0.950 |          |      |      |
| C18  | H15   | 0.950    | C20  | H16  |
|      | 0.950 |          |      |      |
| C24  | H17   | 0.950    | C26  | H18  |
|      | 0.950 |          |      |      |
| C30  | H19   | 0.980    | C30  | H20  |
|      | 0.980 |          |      |      |
| C30  | H21   | 0.980    | C31  | H22  |
|      | 0.980 |          |      |      |
| C31  | H23   | 0.980    | C31  | H24  |
|      | 0.980 |          |      |      |
| C33  | H25   | 0.980    | C33  | H26  |
|      | 0.980 |          |      |      |
| C33  | H27   | 0.980    | C34  | H28  |
|      | 0.980 |          |      |      |

|     |       |       |     |     |
|-----|-------|-------|-----|-----|
| C34 | H29   | 0.980 | C34 | H30 |
|     | 0.980 |       |     |     |
| C35 | H31   | 0.980 | C35 | H32 |
|     | 0.980 |       |     |     |
| C35 | H33   | 0.980 | C37 | H34 |
|     | 0.980 |       |     |     |
| C37 | H35   | 0.980 | C37 | H36 |
|     | 0.980 |       |     |     |
| C38 | H37   | 0.980 | C38 | H38 |
|     | 0.980 |       |     |     |
| C38 | H39   | 0.980 | C39 | H40 |
|     | 0.980 |       |     |     |
| C39 | H41   | 0.980 | C39 | H42 |
|     | 0.980 |       |     |     |
| C41 | H43   | 0.950 | C42 | H44 |
|     | 0.950 |       |     |     |
| C43 | H45   | 0.950 | C48 | H46 |
|     | 0.950 |       |     |     |
| C49 | H47   | 0.950 | C50 | H48 |
|     | 0.950 |       |     |     |
| C53 | H49   | 0.980 | C53 | H50 |
|     | 0.980 |       |     |     |
| C53 | H51   | 0.980 | C54 | H52 |
|     | 0.980 |       |     |     |
| C54 | H53   | 0.980 | C54 | H54 |
|     | 0.980 |       |     |     |
| C55 | H55   | 0.980 | C55 | H56 |
|     | 0.980 |       |     |     |
| C55 | H57   | 0.980 | C56 | H58 |
|     | 0.980 |       |     |     |
| C56 | H59   | 0.980 | C56 | H60 |
|     | 0.980 |       |     |     |

|     |       |       |     |     |
|-----|-------|-------|-----|-----|
| C57 | H61   | 0.980 | C57 | H62 |
|     | 0.980 |       |     |     |
| C57 | H63   | 0.980 | C58 | H64 |
|     | 0.980 |       |     |     |
| C58 | H65   | 0.980 | C58 | H66 |
|     | 0.980 |       |     |     |
| C59 | H67   | 0.980 | C59 | H68 |
|     | 0.980 |       |     |     |
| C59 | H69   | 0.980 | C60 | H70 |
|     | 0.980 |       |     |     |
| C60 | H71   | 0.980 | C60 | H72 |
|     | 0.980 |       |     |     |
| C61 | H73   | 0.980 | C61 | H74 |
|     | 0.980 |       |     |     |
| C61 | H75   | 0.980 | C62 | H76 |
|     | 0.990 |       |     |     |
| C62 | H77   | 0.990 | C63 | H78 |
|     | 0.990 |       |     |     |
| C63 | H79   | 0.990 | C64 | H80 |
|     | 0.990 |       |     |     |
| C64 | H81   | 0.990 | C65 | H82 |
|     | 0.990 |       |     |     |
| C65 | H83   | 0.990 | C66 | H84 |
|     | 0.980 |       |     |     |
| C66 | H85   | 0.980 | C66 | H86 |
|     | 0.980 |       |     |     |

**Table S-7.** Bond angles (°)

| atom | atom | atom | angle      | atom | atom | atom | angle |
|------|------|------|------------|------|------|------|-------|
| P1   | Ni1  | O1   | 88.44(11)  | P1   | Ni1  | N1   |       |
|      |      |      | 171.85(13) |      |      |      |       |
| P1   | Ni1  | C1   | 85.61(17)  | O1   | Ni1  | N1   |       |
|      |      |      | 93.38(14)  |      |      |      |       |
| O1   | Ni1  | C1   | 171.41(19) | N1   | Ni1  | C1   |       |
|      |      |      | 93.37(19)  |      |      |      |       |
| P2   | Ni2  | O2   | 84.12(10)  | P2   | Ni2  | N2   |       |
|      |      |      | 171.72(12) |      |      |      |       |
| P2   | Ni2  | C2   | 90.02(17)  | O2   | Ni2  | N2   |       |
|      |      |      | 92.86(14)  |      |      |      |       |
| O2   | Ni2  | C2   | 171.86(19) | N2   | Ni2  | C2   |       |
|      |      |      | 93.7(2)    |      |      |      |       |
| Ni1  | P1   | C55  | 118.4(2)   | Ni1  | P1   | C56  |       |
|      |      |      | 114.36(19) |      |      |      |       |
| Ni1  | P1   | C57  | 114.43(19) | C55  | P1   | C56  |       |
|      |      |      | 102.9(3)   |      |      |      |       |
| C55  | P1   | C57  | 101.8(3)   | C56  | P1   | C57  |       |
|      |      |      | 102.9(3)   |      |      |      |       |
| Ni2  | P2   | C58  | 122.8(3)   | Ni2  | P2   | C59  |       |
|      |      |      | 108.6(2)   |      |      |      |       |
| Ni2  | P2   | C60  | 114.9(2)   | C58  | P2   | C59  |       |
|      |      |      | 102.3(3)   |      |      |      |       |
| C58  | P2   | C60  | 102.7(3)   | C59  | P2   | C60  |       |
|      |      |      | 103.4(3)   |      |      |      |       |
| Ni1  | O1   | C4   | 130.0(3)   | Ni2  | O2   | C11  |       |
|      |      |      | 129.2(3)   |      |      |      |       |
| C45  | O3   | C46  | 119.8(4)   | C22  | O4   | C28  |       |
|      |      |      | 117.9(4)   |      |      |      |       |
| Ni1  | N1   | C3   | 123.6(3)   | Ni1  | N1   | C17  |       |
|      |      |      | 121.3(3)   |      |      |      |       |



|     |          |     |          |     |     |     |
|-----|----------|-----|----------|-----|-----|-----|
| C3  | N1       | C17 | 115.0(4) | Ni2 | N2  | C10 |
|     | 124.5(3) |     |          |     |     |     |
| Ni2 | N2       | C23 | 122.0(3) | C10 | N2  | C23 |
|     | 113.5(4) |     |          |     |     |     |
| N1  | C3       | C5  | 127.7(5) | O1  | C4  | C5  |
|     | 122.2(4) |     |          |     |     |     |
| O1  | C4       | C9  | 119.5(4) | C5  | C4  | C9  |
|     | 118.3(4) |     |          |     |     |     |
| C3  | C5       | C4  | 122.9(4) | C3  | C5  | C6  |
|     | 117.8(4) |     |          |     |     |     |
| C4  | C5       | C6  | 119.4(4) | C5  | C6  | C7  |
|     | 121.9(5) |     |          |     |     |     |
| C6  | C7       | C8  | 118.0(5) | C7  | C8  | C9  |
|     | 122.9(5) |     |          |     |     |     |
| C4  | C9       | C8  | 119.5(5) | C4  | C9  | C40 |
|     | 118.8(4) |     |          |     |     |     |
| C8  | C9       | C40 | 121.7(4) | N2  | C10 | C12 |
|     | 127.6(4) |     |          |     |     |     |
| O2  | C11      | C12 | 123.3(4) | O2  | C11 | C16 |
|     | 118.5(4) |     |          |     |     |     |
| C12 | C11      | C16 | 118.1(4) | C10 | C12 | C11 |
|     | 122.0(4) |     |          |     |     |     |
| C10 | C12      | C13 | 118.5(4) | C11 | C12 | C13 |
|     | 119.5(4) |     |          |     |     |     |
| C12 | C13      | C14 | 122.1(5) | C13 | C14 | C15 |
|     | 118.5(5) |     |          |     |     |     |
| C14 | C15      | C16 | 121.5(5) | C11 | C16 | C15 |
|     | 120.2(4) |     |          |     |     |     |
| C11 | C16      | C47 | 117.4(4) | C15 | C16 | C47 |
|     | 122.1(4) |     |          |     |     |     |
| N1  | C17      | C18 | 120.1(5) | N1  | C17 | C22 |
|     | 121.2(4) |     |          |     |     |     |

|     |                 |     |          |     |     |     |
|-----|-----------------|-----|----------|-----|-----|-----|
| C18 | C17<br>121.9(5) | C22 | 118.6(5) | C17 | C18 | C19 |
| C18 | C19<br>122.3(5) | C20 | 116.9(5) | C18 | C19 | C32 |
| C20 | C19<br>123.9(5) | C32 | 120.8(5) | C19 | C20 | C21 |
| C20 | C21<br>121.7(4) | C22 | 116.6(5) | C20 | C21 | C29 |
| C22 | C21<br>114.3(4) | C29 | 121.6(4) | O4  | C22 | C17 |
| O4  | C22<br>122.1(5) | C21 | 123.6(5) | C17 | C22 | C21 |
| N2  | C23<br>119.8(4) | C24 | 120.9(4) | N2  | C23 | C28 |
| C24 | C23<br>121.5(5) | C28 | 119.3(4) | C23 | C24 | C25 |
| C24 | C25<br>122.1(5) | C26 | 118.4(5) | C24 | C25 | C36 |
| C26 | C25<br>122.4(5) | C36 | 119.5(5) | C25 | C26 | C27 |
| C26 | C27<br>120.1(4) | C28 | 117.5(5) | C26 | C27 | C29 |
| C28 | C27<br>115.6(4) | C29 | 122.4(5) | O4  | C28 | C23 |
| O4  | C28<br>120.9(5) | C27 | 123.4(4) | C23 | C28 | C27 |
| C21 | C29<br>109.4(4) | C27 | 110.7(4) | C21 | C29 | C30 |
| C21 | C29<br>109.8(4) | C31 | 107.6(4) | C27 | C29 | C30 |
| C27 | C29<br>109.8(4) | C31 | 109.6(4) | C30 | C29 | C31 |

|     |           |     |          |     |     |     |
|-----|-----------|-----|----------|-----|-----|-----|
| C19 | C32       | C33 | 109.2(6) | C19 | C32 | C34 |
|     | 112.3(6)  |     |          |     |     |     |
| C19 | C32       | C35 | 111.8(6) | C33 | C32 | C34 |
|     | 116.0(12) |     |          |     |     |     |
| C33 | C32       | C35 | 98.6(11) | C34 | C32 | C35 |
|     | 108.2(10) |     |          |     |     |     |
| C25 | C36       | C37 | 110.1(7) | C25 | C36 | C38 |
|     | 109.8(6)  |     |          |     |     |     |
| C25 | C36       | C39 | 111.8(6) | C37 | C36 | C38 |
|     | 105.7(8)  |     |          |     |     |     |
| C37 | C36       | C39 | 116.6(9) | C38 | C36 | C39 |
|     | 102.2(9)  |     |          |     |     |     |
| C9  | C40       | C41 | 121.4(5) | C9  | C40 | C45 |
|     | 120.8(5)  |     |          |     |     |     |
| C41 | C40       | C45 | 117.8(5) | C40 | C41 | C42 |
|     | 120.3(5)  |     |          |     |     |     |
| C41 | C42       | C43 | 120.3(5) | C42 | C43 | C44 |
|     | 121.5(5)  |     |          |     |     |     |
| C43 | C44       | C45 | 116.6(5) | C43 | C44 | C52 |
|     | 120.8(5)  |     |          |     |     |     |
| C45 | C44       | C52 | 122.6(5) | O3  | C45 | C40 |
|     | 114.1(4)  |     |          |     |     |     |
| O3  | C45       | C44 | 122.4(5) | C40 | C45 | C44 |
|     | 123.5(5)  |     |          |     |     |     |
| O3  | C46       | C47 | 114.2(4) | O3  | C46 | C51 |
|     | 122.1(5)  |     |          |     |     |     |
| C47 | C46       | C51 | 123.7(5) | C16 | C47 | C46 |
|     | 119.4(5)  |     |          |     |     |     |
| C16 | C47       | C48 | 123.0(5) | C46 | C47 | C48 |
|     | 117.3(5)  |     |          |     |     |     |
| C47 | C48       | C49 | 121.5(5) | C48 | C49 | C50 |
|     | 119.3(5)  |     |          |     |     |     |

|     |           |     |           |     |     |     |
|-----|-----------|-----|-----------|-----|-----|-----|
| C49 | C50       | C51 | 122.0(5)  | C46 | C51 | C50 |
|     | 116.1(5)  |     |           |     |     |     |
| C46 | C51       | C52 | 122.8(5)  | C50 | C51 | C52 |
|     | 121.0(5)  |     |           |     |     |     |
| C44 | C52       | C51 | 110.0(4)  | C44 | C52 | C53 |
|     | 108.5(4)  |     |           |     |     |     |
| C44 | C52       | C54 | 110.1(5)  | C51 | C52 | C53 |
|     | 109.0(5)  |     |           |     |     |     |
| C51 | C52       | C54 | 109.7(5)  | C53 | C52 | C54 |
|     | 109.6(5)  |     |           |     |     |     |
| C61 | C62       | C63 | 133.6(13) | C62 | C63 | C64 |
|     | 115.6(11) |     |           |     |     |     |
| C63 | C64       | C65 | 103.7(12) | C64 | C65 | C66 |
|     | 100.7(13) |     |           |     |     |     |

**Table S-8.** Bond angles involving hydrogens (°)

| atom | atom  | atom | angle | atom | atom | atom | angle |
|------|-------|------|-------|------|------|------|-------|
| Ni1  | C1    | H1   | 109.5 | Ni1  | C1   | H2   |       |
|      | 109.5 |      |       |      |      |      |       |
| Ni1  | C1    | H3   | 109.5 | H1   | C1   | H2   |       |
|      | 109.5 |      |       |      |      |      |       |
| H1   | C1    | H3   | 109.5 | H2   | C1   | H3   |       |
|      | 109.5 |      |       |      |      |      |       |
| Ni2  | C2    | H4   | 109.5 | Ni2  | C2   | H5   |       |
|      | 109.5 |      |       |      |      |      |       |
| Ni2  | C2    | H6   | 109.5 | H4   | C2   | H5   |       |
|      | 109.5 |      |       |      |      |      |       |
| H4   | C2    | H6   | 109.5 | H5   | C2   | H6   |       |
|      | 109.5 |      |       |      |      |      |       |
| N1   | C3    | H7   | 116.2 | C5   | C3   | H7   |       |
|      | 116.2 |      |       |      |      |      |       |
| C5   | C6    | H8   | 119.0 | C7   | C6   | H8   |       |
|      | 119.0 |      |       |      |      |      |       |
| C6   | C7    | H9   | 121.0 | C8   | C7   | H9   |       |
|      | 121.0 |      |       |      |      |      |       |
| C7   | C8    | H10  | 118.5 | C9   | C8   | H10  |       |
|      | 118.5 |      |       |      |      |      |       |
| N2   | C10   | H11  | 116.2 | C12  | C10  | H11  |       |
|      | 116.2 |      |       |      |      |      |       |
| C12  | C13   | H12  | 118.9 | C14  | C13  | H12  |       |
|      | 118.9 |      |       |      |      |      |       |
| C13  | C14   | H13  | 120.7 | C15  | C14  | H13  |       |
|      | 120.7 |      |       |      |      |      |       |
| C14  | C15   | H14  | 119.3 | C16  | C15  | H14  |       |
|      | 119.3 |      |       |      |      |      |       |
| C17  | C18   | H15  | 119.0 | C19  | C18  | H15  |       |
|      | 119.0 |      |       |      |      |      |       |

|     |       |     |       |     |     |     |
|-----|-------|-----|-------|-----|-----|-----|
| C19 | C20   | H16 | 118.1 | C21 | C20 | H16 |
|     | 118.1 |     |       |     |     |     |
| C23 | C24   | H17 | 119.3 | C25 | C24 | H17 |
|     | 119.3 |     |       |     |     |     |
| C25 | C26   | H18 | 118.8 | C27 | C26 | H18 |
|     | 118.8 |     |       |     |     |     |
| C29 | C30   | H19 | 109.5 | C29 | C30 | H20 |
|     | 109.5 |     |       |     |     |     |
| C29 | C30   | H21 | 109.5 | H19 | C30 | H20 |
|     | 109.5 |     |       |     |     |     |
| H19 | C30   | H21 | 109.5 | H20 | C30 | H21 |
|     | 109.5 |     |       |     |     |     |
| C29 | C31   | H22 | 109.5 | C29 | C31 | H23 |
|     | 109.5 |     |       |     |     |     |
| C29 | C31   | H24 | 109.5 | H22 | C31 | H23 |
|     | 109.5 |     |       |     |     |     |
| H22 | C31   | H24 | 109.5 | H23 | C31 | H24 |
|     | 109.5 |     |       |     |     |     |
| C32 | C33   | H25 | 109.5 | C32 | C33 | H26 |
|     | 109.5 |     |       |     |     |     |
| C32 | C33   | H27 | 109.5 | H25 | C33 | H26 |
|     | 109.5 |     |       |     |     |     |
| H25 | C33   | H27 | 109.5 | H26 | C33 | H27 |
|     | 109.5 |     |       |     |     |     |
| C32 | C34   | H28 | 109.5 | C32 | C34 | H29 |
|     | 109.5 |     |       |     |     |     |
| C32 | C34   | H30 | 109.5 | H28 | C34 | H29 |
|     | 109.5 |     |       |     |     |     |
| H28 | C34   | H30 | 109.5 | H29 | C34 | H30 |
|     | 109.5 |     |       |     |     |     |
| C32 | C35   | H31 | 109.5 | C32 | C35 | H32 |
|     | 109.5 |     |       |     |     |     |

|     |              |     |       |     |     |     |
|-----|--------------|-----|-------|-----|-----|-----|
| C32 | C35<br>109.5 | H33 | 109.5 | H31 | C35 | H32 |
| H31 | C35<br>109.5 | H33 | 109.5 | H32 | C35 | H33 |
| C36 | C37<br>109.5 | H34 | 109.5 | C36 | C37 | H35 |
| C36 | C37<br>109.5 | H36 | 109.5 | H34 | C37 | H35 |
| H34 | C37<br>109.5 | H36 | 109.5 | H35 | C37 | H36 |
| C36 | C38<br>109.5 | H37 | 109.5 | C36 | C38 | H38 |
| C36 | C38<br>109.5 | H39 | 109.5 | H37 | C38 | H38 |
| H37 | C38<br>109.5 | H39 | 109.5 | H38 | C38 | H39 |
| C36 | C39<br>109.5 | H40 | 109.5 | C36 | C39 | H41 |
| C36 | C39<br>109.5 | H42 | 109.5 | H40 | C39 | H41 |
| H40 | C39<br>109.5 | H42 | 109.5 | H41 | C39 | H42 |
| C40 | C41<br>119.9 | H43 | 119.9 | C42 | C41 | H43 |
| C41 | C42<br>119.8 | H44 | 119.8 | C43 | C42 | H44 |
| C42 | C43<br>119.3 | H45 | 119.3 | C44 | C43 | H45 |
| C47 | C48<br>119.2 | H46 | 119.2 | C49 | C48 | H46 |
| C48 | C49<br>120.3 | H47 | 120.4 | C50 | C49 | H47 |

|     |       |     |       |     |     |     |
|-----|-------|-----|-------|-----|-----|-----|
| C49 | C50   | H48 | 119.0 | C51 | C50 | H48 |
|     | 119.0 |     |       |     |     |     |
| C52 | C53   | H49 | 109.5 | C52 | C53 | H50 |
|     | 109.5 |     |       |     |     |     |
| C52 | C53   | H51 | 109.5 | H49 | C53 | H50 |
|     | 109.5 |     |       |     |     |     |
| H49 | C53   | H51 | 109.5 | H50 | C53 | H51 |
|     | 109.5 |     |       |     |     |     |
| C52 | C54   | H52 | 109.5 | C52 | C54 | H53 |
|     | 109.5 |     |       |     |     |     |
| C52 | C54   | H54 | 109.5 | H52 | C54 | H53 |
|     | 109.5 |     |       |     |     |     |
| H52 | C54   | H54 | 109.5 | H53 | C54 | H54 |
|     | 109.5 |     |       |     |     |     |
| P1  | C55   | H55 | 109.5 | P1  | C55 | H56 |
|     | 109.5 |     |       |     |     |     |
| P1  | C55   | H57 | 109.5 | H55 | C55 | H56 |
|     | 109.5 |     |       |     |     |     |
| H55 | C55   | H57 | 109.5 | H56 | C55 | H57 |
|     | 109.5 |     |       |     |     |     |
| P1  | C56   | H58 | 109.5 | P1  | C56 | H59 |
|     | 109.5 |     |       |     |     |     |
| P1  | C56   | H60 | 109.5 | H58 | C56 | H59 |
|     | 109.5 |     |       |     |     |     |
| H58 | C56   | H60 | 109.5 | H59 | C56 | H60 |
|     | 109.5 |     |       |     |     |     |
| P1  | C57   | H61 | 109.5 | P1  | C57 | H62 |
|     | 109.5 |     |       |     |     |     |
| P1  | C57   | H63 | 109.5 | H61 | C57 | H62 |
|     | 109.5 |     |       |     |     |     |
| H61 | C57   | H63 | 109.5 | H62 | C57 | H63 |
|     | 109.5 |     |       |     |     |     |



|     |       |     |       |     |     |     |
|-----|-------|-----|-------|-----|-----|-----|
| P2  | C58   | H64 | 109.5 | P2  | C58 | H65 |
|     | 109.5 |     |       |     |     |     |
| P2  | C58   | H66 | 109.5 | H64 | C58 | H65 |
|     | 109.5 |     |       |     |     |     |
| H64 | C58   | H66 | 109.5 | H65 | C58 | H66 |
|     | 109.5 |     |       |     |     |     |
| P2  | C59   | H67 | 109.5 | P2  | C59 | H68 |
|     | 109.5 |     |       |     |     |     |
| P2  | C59   | H69 | 109.5 | H67 | C59 | H68 |
|     | 109.5 |     |       |     |     |     |
| H67 | C59   | H69 | 109.5 | H68 | C59 | H69 |
|     | 109.5 |     |       |     |     |     |
| P2  | C60   | H70 | 109.5 | P2  | C60 | H71 |
|     | 109.5 |     |       |     |     |     |
| P2  | C60   | H72 | 109.5 | H70 | C60 | H71 |
|     | 109.5 |     |       |     |     |     |
| H70 | C60   | H72 | 109.5 | H71 | C60 | H72 |
|     | 109.5 |     |       |     |     |     |
| C62 | C61   | H73 | 109.5 | C62 | C61 | H74 |
|     | 109.5 |     |       |     |     |     |
| C62 | C61   | H75 | 109.5 | H73 | C61 | H74 |
|     | 109.5 |     |       |     |     |     |
| H73 | C61   | H75 | 109.5 | H74 | C61 | H75 |
|     | 109.5 |     |       |     |     |     |
| C61 | C62   | H76 | 103.8 | C61 | C62 | H77 |
|     | 103.8 |     |       |     |     |     |
| C63 | C62   | H76 | 103.8 | C63 | C62 | H77 |
|     | 103.8 |     |       |     |     |     |
| H76 | C62   | H77 | 105.4 | C62 | C63 | H78 |
|     | 108.4 |     |       |     |     |     |
| C62 | C63   | H79 | 108.4 | C64 | C63 | H78 |
|     | 108.4 |     |       |     |     |     |

|     |       |     |       |     |     |     |
|-----|-------|-----|-------|-----|-----|-----|
| C64 | C63   | H79 | 108.4 | H78 | C63 | H79 |
|     | 107.4 |     |       |     |     |     |
| C63 | C64   | H80 | 111.0 | C63 | C64 | H81 |
|     | 111.0 |     |       |     |     |     |
| C65 | C64   | H80 | 111.0 | C65 | C64 | H81 |
|     | 111.0 |     |       |     |     |     |
| H80 | C64   | H81 | 109.0 | C64 | C65 | H82 |
|     | 111.6 |     |       |     |     |     |
| C64 | C65   | H83 | 111.6 | C66 | C65 | H82 |
|     | 111.6 |     |       |     |     |     |
| C66 | C65   | H83 | 111.6 | H82 | C65 | H83 |
|     | 109.4 |     |       |     |     |     |
| C65 | C66   | H84 | 109.5 | C65 | C66 | H85 |
|     | 109.5 |     |       |     |     |     |
| C65 | C66   | H86 | 109.5 | H84 | C66 | H85 |
|     | 109.5 |     |       |     |     |     |
| H84 | C66   | H86 | 109.5 | H85 | C66 | H86 |
|     | 109.5 |     |       |     |     |     |
